# Supplementary material for: Green synthesis of gold nanoparticles under sunlight irradiation and their colorimetric detection of Ni2+ and Co2+ ions
Source: Royal Society of Chemistry journal article supplement (doi:10.1039/c4ra14034f), 2015-01-01
Supplement: c4ra14034f1.pdf [file c4ra14034f1.pdf]

## Electronic supporting information

### Green synthesis of gold nanoparticles under sunlight irradiation and its colorimetric detection of Ni<sup>2+</sup> and Co<sup>2+</sup> ions

M. Annadhasan<sup>a</sup>, J. Kasthuri<sup>b</sup> and N. Rajendiran<sup>a\*</sup>

<sup>a</sup>Department of Polymer Science, University of Madras, Maraimalai campus, Guindy, Chennai, Tamil Nadu, India-600 025.

<sup>b</sup>Department of Chemistry, Quaid-E-Millath Government College for Women (Autonomous), Chennai, Tamil Nadu, India-600002.

**Fig. S1.** UV-visible spectra of NaValC stabilized AuNPs fresh and after six months

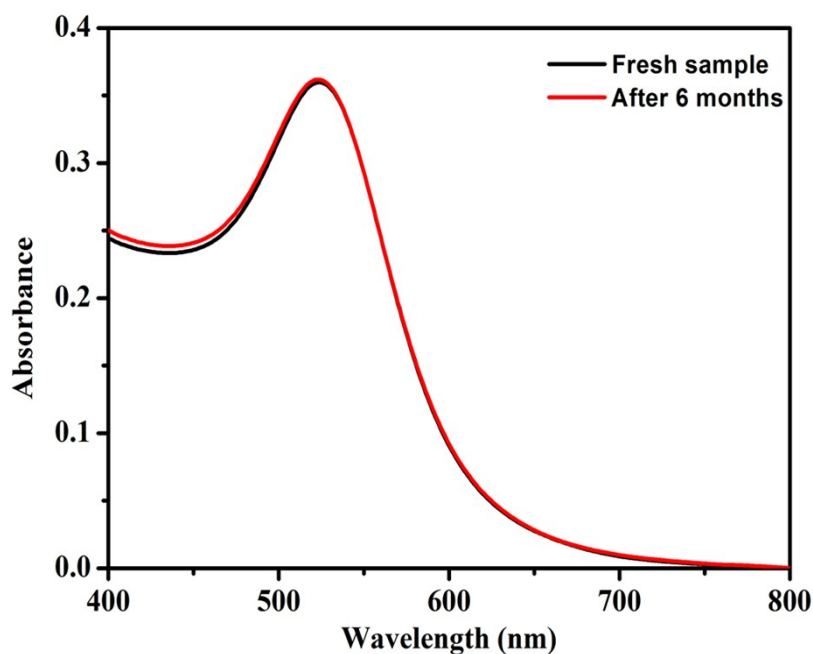

**Fig. S2.** UV-visible spectra of AuNPs synthesized at different conditions

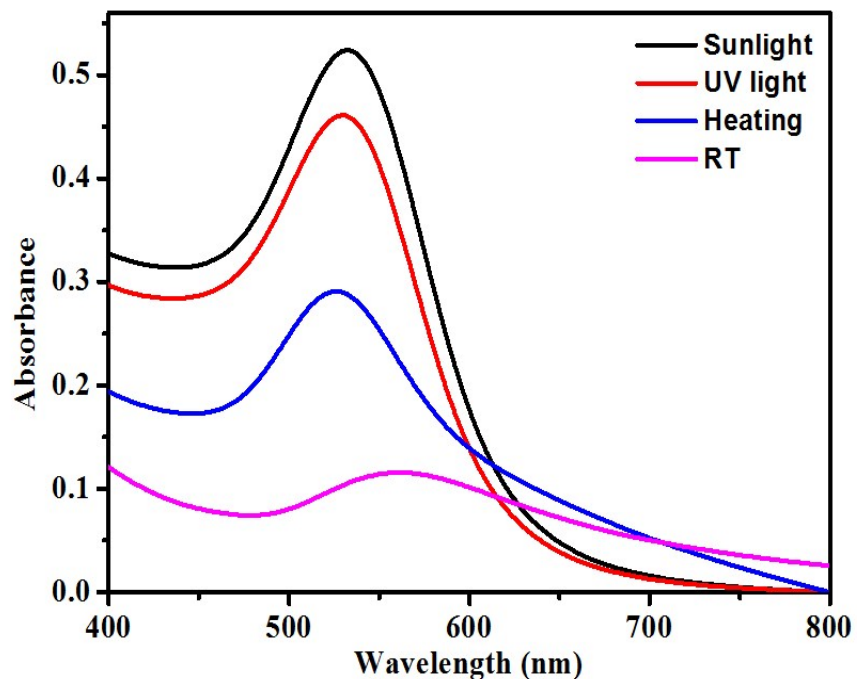

**Fig. S3.** Average particle size distribution of the AuNPs at low (a) and high (b) concentrations of NaValC

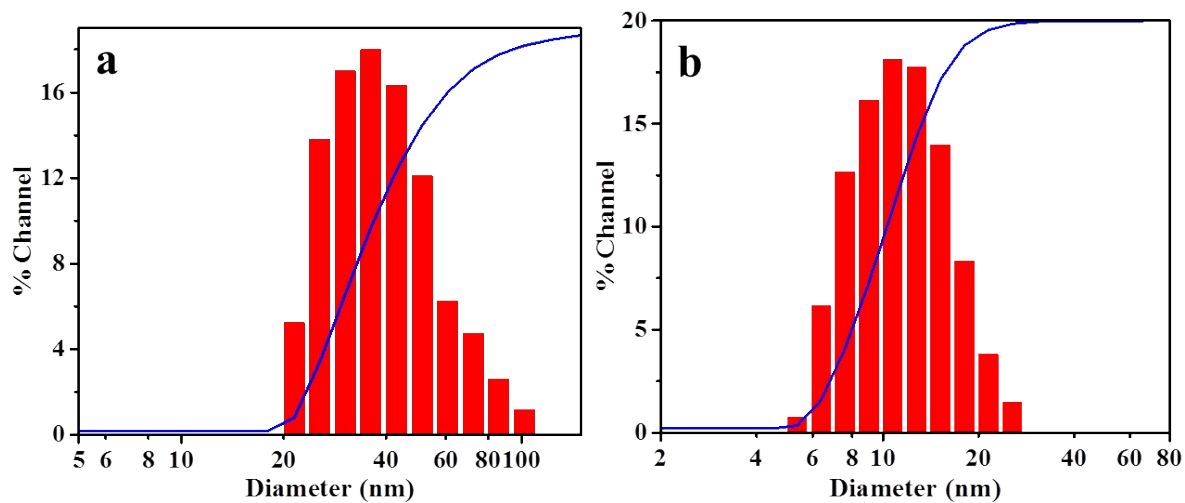

**Table. S1** Comparative table for the sensing of metal ions using AuNPs

| S.No | Method              | Probe                                         | Target                               | LOD                      | Time    | Ref.          |
|------|---------------------|-----------------------------------------------|--------------------------------------|--------------------------|---------|---------------|
| 1    | Colorimetric method | Peptide-modified AuNPs                        | Ni <sup>2+</sup><br>Co <sup>2+</sup> | 0.3 mM<br>2.0 mM         | 3-5 min | 1             |
| 2    |                     | Thiosulfate stabilized AuNPs                  | Co <sup>2+</sup>                     | 0.04 mM                  | 20 min  | 2             |
| 3    |                     | Carboxyl-Functionalized CdS Quantum Dots      | Co <sup>2+</sup>                     | 0.23 µg mL <sup>-1</sup> | 5 min   | 3             |
| 4    |                     | Dopamine dithiocarbamate functionalized AgNPs | Co <sup>2+</sup>                     | 14 µM                    | 10 min  | 4             |
| 5    |                     | GSH-stabilized AgNPs                          | Ni <sup>2+</sup>                     | 75 µM                    | 1-5 min | 5             |
| 6    |                     | GSH and L-Cys silvernanoplates                | Ni <sup>2+</sup>                     | 120nM                    | 6 min   | 6             |
| 7    |                     | coumarin derivatives                          | Ni <sup>2+</sup>                     | 0.5 µM                   | 10 min  | 7             |
| 8    |                     | CVal-AuNPs                                    | Ni <sup>2+</sup><br>Co <sup>2+</sup> | 10.0 nM<br>10.0 nM       | 2 min   | Present study |

**Fig. S4** Plot of absorbance intensity difference versus concentrations of Ni<sup>2+</sup> ions in drinking and tap water samples

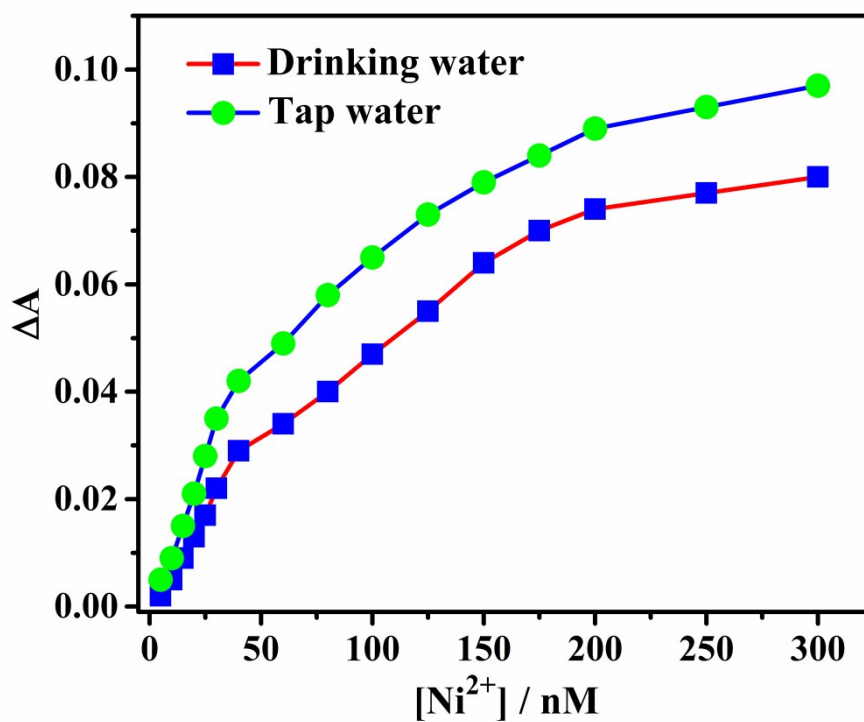

**Fig. S5** Plot of absorbance intensity difference versus concentrations of  $\text{Co}^{2+}$  in drinking and tap water samples

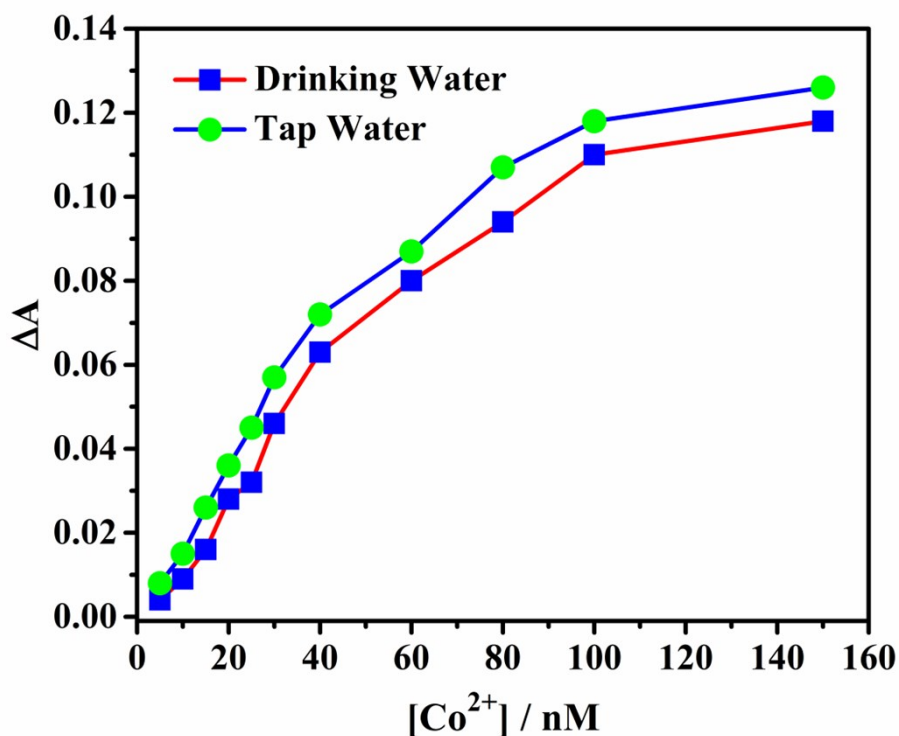

References:

1. M. Zhang, Y. Liu and B. Ye, *Analyst*, 2012, **137**, 601–607.
2. Z. Zhang, J. Zhang, T. Lou, D. Pan, L. Chen, C. Qua and Z. Chen, *Analyst*, 2012, **137**, 400–405.
3. A. H. Gore, D. B. Gunjal, M. R. Kokate, V. Sudarsan, P. V. Anbhule, S. R. Patil, and G. B. Kolekar, *ACS Appl. Mater. Interfaces*, 2012, **4**, 5217–5226.
4. V. N. Mehta, A. K. Mungara and S. K. Kailasa, *Anal. Methods*, 2013, **5**, 1818–1822.
5. H. Li, Z. Cui and C. Han, *Sensors. Actuat. B*, 2009, **143**, 87–92.
6. T. Kiatkumjorn, P. Rattanasat, W. Siangproh, O. Chailapakul, and N. Praphairaksit, *Talanta*, 2014, **128**, 215–220.
7. J. Jiang, C. Gou, J. Luo, C. Yi, and X. Liu, *Inorg. Chem. Commun.*, 2012, **15**, 12–15.
